# Supplementary material for: Gain-of-function genetic screening identifies the antiviral function of TMEM120A via STING activation
Source: PubMed Central journal article supplement (PMC8748537; doi:10.1038/s41467-021-27670-1), 2022-01-10
Supplement: 41467_2021_27670_MOESM3_ESM.pdf [file 41467_2021_27670_MOESM3_ESM.pdf]

## Description of Additional Supplementary Files

### **Supplementary Data 1. Raw data and data analysis of human genome-wide ORFs overexpression screen of ZIKV host factors.**

**Raw results:** List of ORF encoded proteins and read counts of ORF barcodes in cells after 10 days non-infection (Mock) or ZIKV infection (duplicate: Exp1 and Exp2). The read counts of ORF were normalized using DEseq2. Exp: experimental group.

**Restriction factors:** List of restriction factors selected with  $\log_2FC > 0.5$ .  $\log_2FC$  including  $\log_2(\text{Exp1}/\text{Mock})$  and  $\log_2(\text{Exp1}/\text{Mock})$  means the  $\log_2$  fold changes (FC) in reads count collected from ZIKV infected cells relative to uninfected cells.

**Dependent factors:** List of dependent factors selected with  $\log_2FC < -0.5$ .  $\log_2FC$  including  $\log_2(\text{Exp1}/\text{Mock})$  and  $\log_2(\text{Exp1}/\text{Mock})$  means the  $\log_2$  fold changes (FC) in reads count collected from ZIKV infected cells relative to uninfected cells.

**DE\_analysis:** Output of differential expression (DE) analysis compared to control. baseMean: mean values from all normalized samples; lfcSE: standard error for  $\log_2$  fold change; stat: statistic value for the null hypothesis; padj: false discovery rate.
